# Supplementary material for: Transcriptomic Profile of Lymphovascular Invasion, a Known Risk Factor of Pancreatic Ductal Adenocarcinoma Metastasis
Source: MDPI journal article supplement (doi:10.3390/cancers12082033), 2020-07-24
Supplement: s1 [file s1]

Supplementary Materials

## Transcriptomic Profile of Lymphovascular Invasion, a Known Risk Factor of Pancreatic Ductal Adenocarcinoma Metastasis

Hideo Takahashi, Eriko Katsuta, Li Yan, Yoshihisa Tokumaru, Matthew H.G. Katz, and Kazuaki Takabe

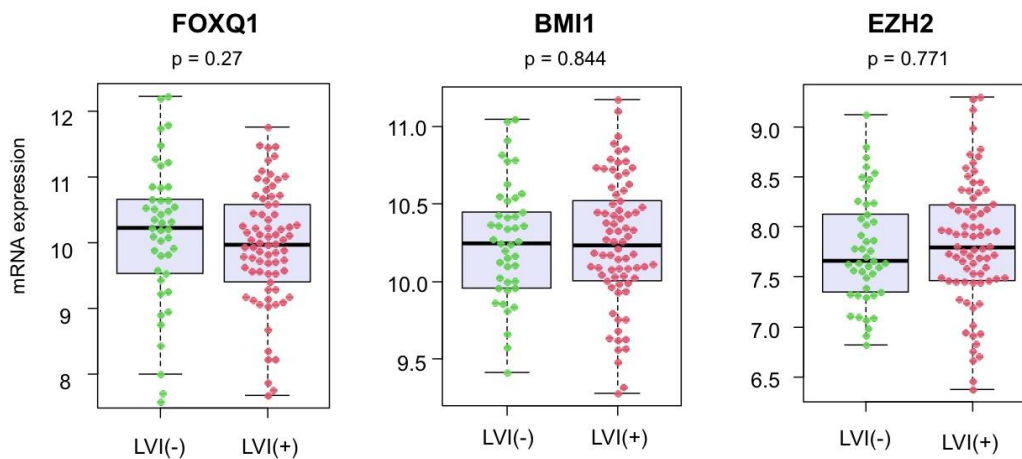

**Figure S1.** Gene expression comparison involved in cancer stem cell regulation and maintenance genes between the LVI-negative and -positive tumors. *LVI*, lymphovascular invasion; *FOXQ1*, Forkhead box protein Q1; *BMI1*, B cell-specific Moloney murine leukemia virus integration site 1; *EZH2*, Enhancer of zeste homolog 2.

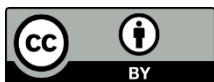

© 2020 by the authors. Licensee MDPI, Basel, Switzerland. This article is an open access article distributed under the terms and conditions of the Creative Commons Attribution (CC BY) license (<http://creativecommons.org/licenses/by/4.0/>).
